# Supplementary material for: Isolation, antimicrobial activity, and absolute configuration of the furylidene tetronic acid core of pestalotic acids A–G
Source: Royal Society of Chemistry journal article supplement (doi:10.1039/c2ob25469g), 2012-01-01

## **Electronic Supplementary Information**

### **Isolation, antimicrobial activity, and absolute configuration of the furylidene tetronic acid core of pestalotic acids A–G**

Fan Zhang,<sup>a,Δ</sup> Gang Ding,<sup>b,Δ</sup> Li Li,<sup>c</sup> Xiaoyue Cai,<sup>a</sup> Yikang Si,<sup>c</sup> Liangdong Guo,<sup>a</sup> and Yongsheng Che<sup>\*a,d</sup>

<sup>a</sup> *State Key Laboratory of Mycology, Institute of Microbiology, Chinese Academy of Sciences, Beijing 100190, People's Republic of China. E-mail: [cheys@im.ac.cn](mailto:cheys@im.ac.cn)*

<sup>b</sup> *Institute of Medicinal Plant Development, Chinese Academy of Medical Sciences and Peking Union Medical College, Beijing 100050, People's Republic of China*

<sup>c</sup> *Institute of Materia Medica, Chinese Academy of Medical Sciences and Peking Union Medical College, Beijing 100050, People's Republic of China*

<sup>d</sup> *Beijing Institute of Pharmacology & Toxicology, Beijing 100850, People's Republic of China*

#### **Contents**

#### **Experimental Section**

- Figure S1.** <sup>1</sup>H NMR spectrum of pestalotic acid A (**1**; 500 MHz, CDCl<sub>3</sub>)
- Figure S2.** <sup>13</sup>C NMR spectrum of pestalotic acid A (**1**; 125 MHz, CDCl<sub>3</sub>)
- Figure S3.** <sup>1</sup>H NMR spectrum of pestalotic acid B (**2**; 500 MHz, acetone-*d*<sub>6</sub>)
- Figure S4.** <sup>13</sup>C NMR spectrum of pestalotic acid B (**2**; 100 MHz, acetone-*d*<sub>6</sub>)
- Figure S5.** <sup>1</sup>H NMR spectrum of pestalotic acid C (**3**; 500 MHz, acetone-*d*<sub>6</sub>)
- Figure S6.** <sup>13</sup>C NMR spectrum of pestalotic acid C (**3**; 100 MHz, acetone-*d*<sub>6</sub>)
- Figure S7.** <sup>1</sup>H NMR spectrum of pestalotic acid D (**4**; 400 MHz, CDCl<sub>3</sub>)
- Figure S8.** <sup>13</sup>C NMR spectrum of pestalotic acid D (**4**; 100 MHz, CDCl<sub>3</sub>)
- Figure S9.** <sup>1</sup>H NMR spectrum of pestalotic acid E (**5**; 400 MHz, CDCl<sub>3</sub>)
- Figure S10.** <sup>13</sup>C NMR spectrum of pestalotic acid E (**5**; 100 MHz, CDCl<sub>3</sub>)
- Figure S11.** <sup>1</sup>H NMR spectrum of pestalotic acid F (**6**; 400 MHz, DMSO-*d*<sub>6</sub>)
- Figure S12.** <sup>13</sup>C NMR spectrum of pestalotic acid F (**6**; 100 MHz, DMSO-*d*<sub>6</sub>)
- Figure S13.** <sup>1</sup>H NMR spectrum of pestalotic acid G (**7**; 500 MHz, CDCl<sub>3</sub>)
- Figure S14.** <sup>13</sup>C NMR spectrum of pestalotic acid G (**7**; 125 MHz, CDCl<sub>3</sub>)
- Figure S15.** CD spectrum of pestalotic acid A (**1**) in MeOH

- Figure S16.** CD spectrum of pestalotic acid B (**2**) in MeOH
- Figure S17.** CD spectrum of pestalotic acid C (**3**) in MeOH
- Figure S18.** CD spectrum of pestalotic acid D (**4**) in MeOH
- Figure S19.** CD spectrum of pestalotic acid E (**5**) in MeOH
- Figure S20.** CD spectrum of pestalotic acid F (**6**) in MeOH
- Figure S21.** CD spectrum of pestalotic acid G (**7**) in MeOH
- Figure S22.** The optimized conformers for the *E*-isomers of **8a** and **8b**
- Figure S23.** The optimized conformers for the *Z*-isomers of **8a** and **8b**
- Figure S24.** The calculated UV spectrum of the *E*-isomers of **8a** and **8b** and the measured UV spectrum of **1**
- Figure S25.** The calculated UV spectrum of the *Z*-isomers of **8a** and **8b** and the measured UV spectrum of **1**
- Figure S26.** The calculated UV spectrum of **8a** and **8b** and the measured UV spectrum of **1**

**Figure S1.**  $^1\text{H}$  NMR Spectrum of Pestalotic Acid A (**1**; 500 MHz;  $\text{CDCl}_3$ )

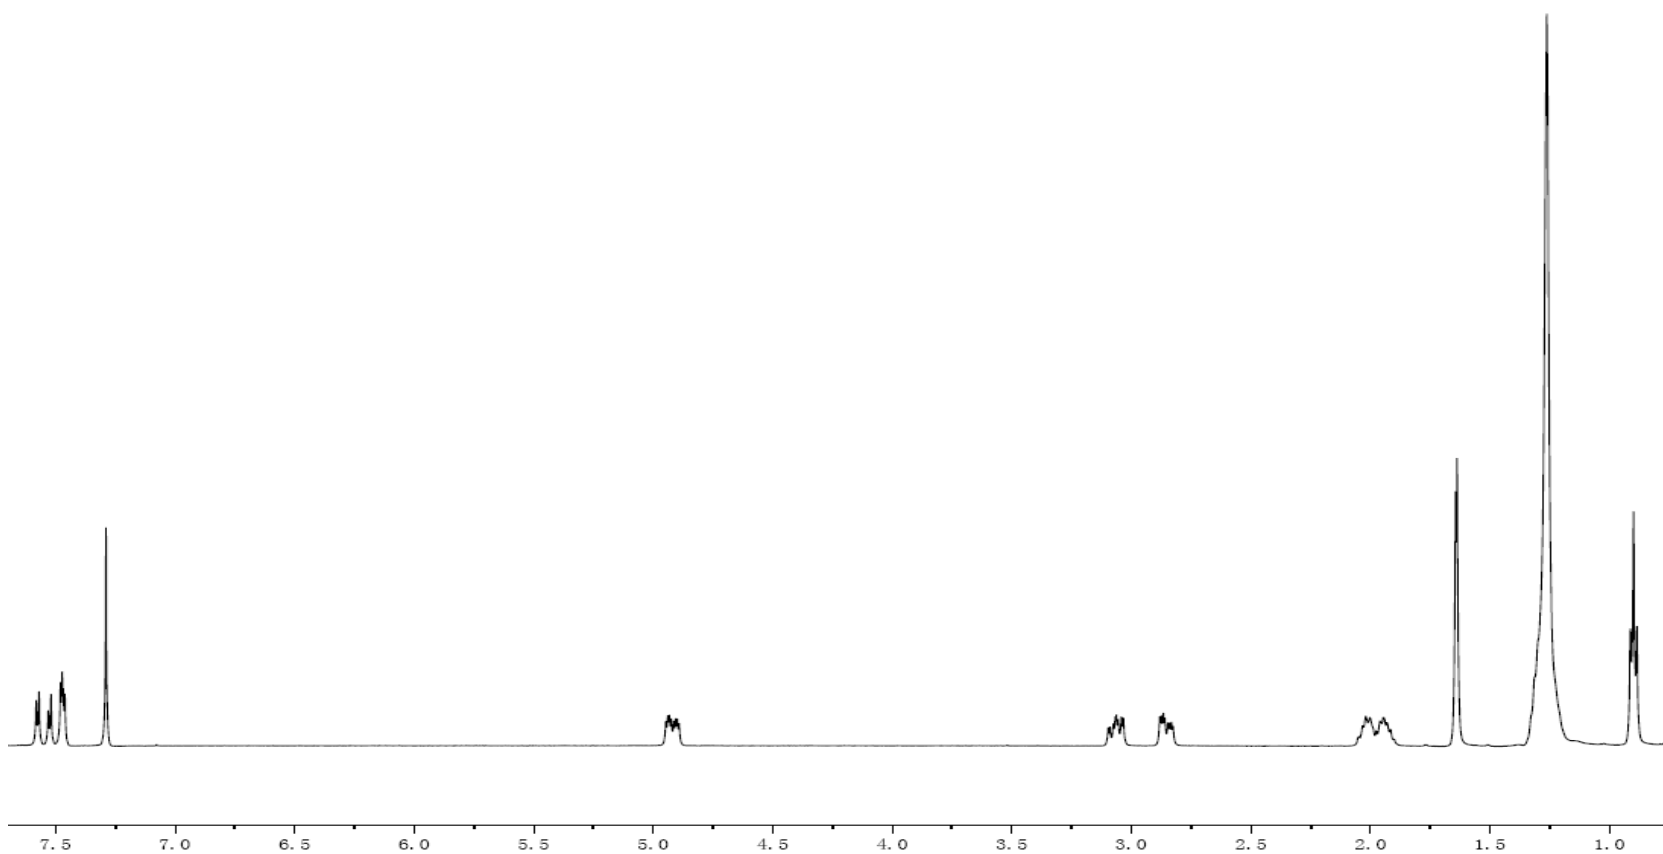

**Figure S2.**  $^{13}\text{C}$  NMR Spectrum of Pestalotic Acid A (**1**; 125 MHz;  $\text{CDCl}_3$ )

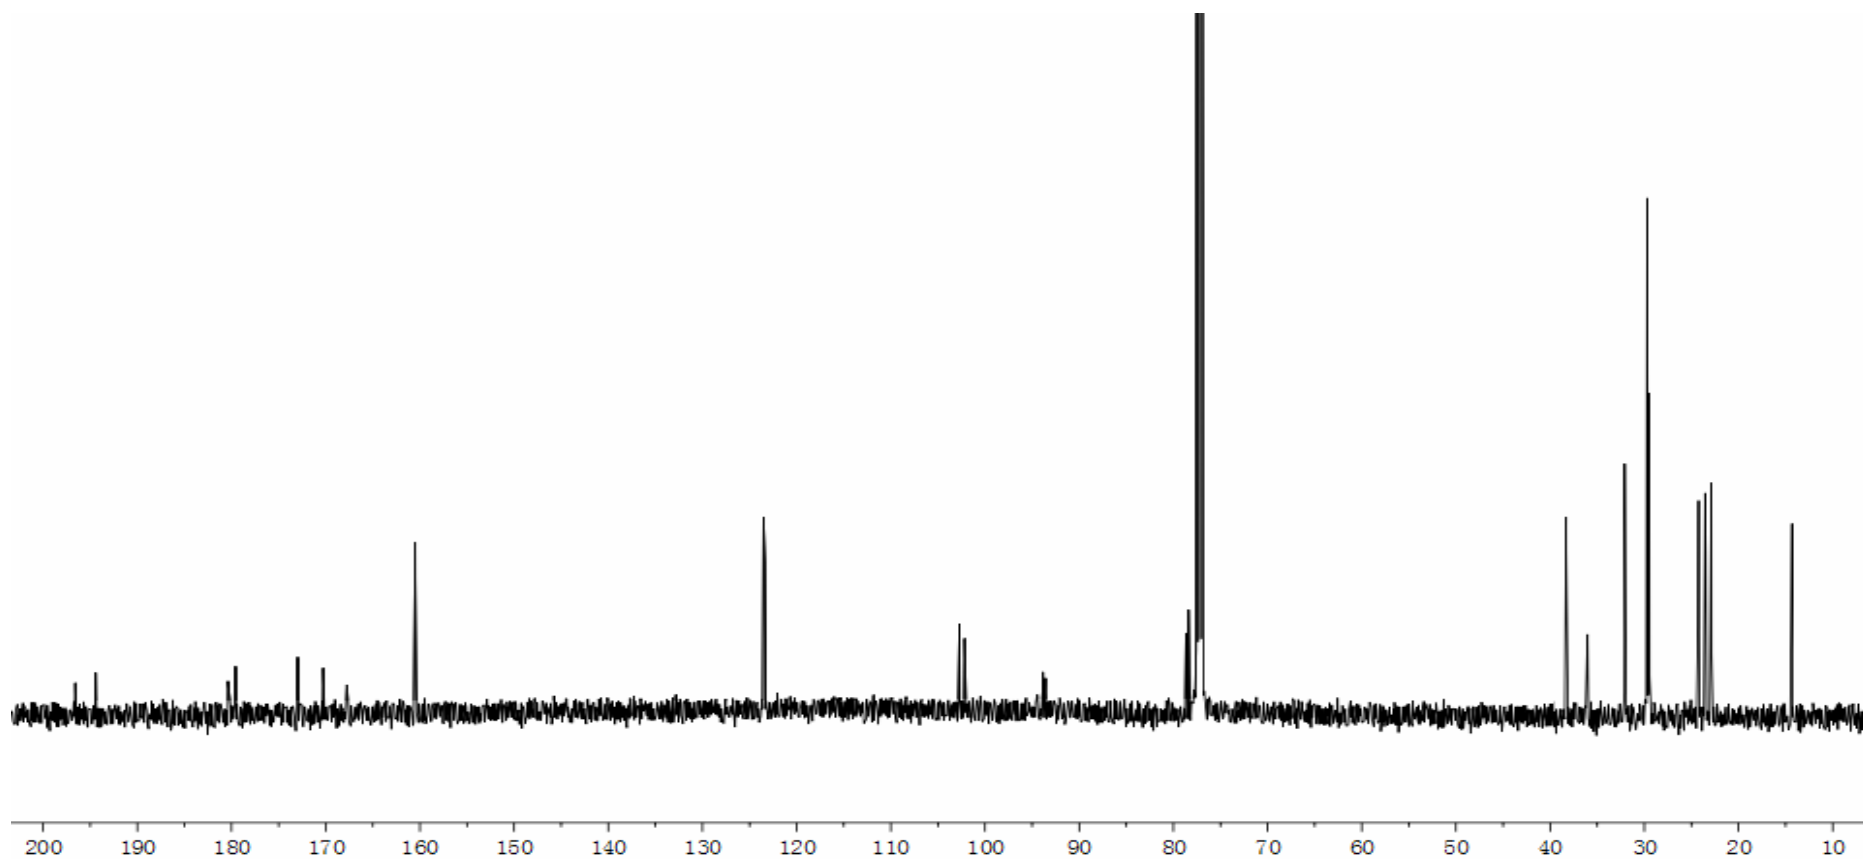

**Figure S3.**  $^1\text{H}$  NMR Spectrum of Pestalotic Acid B (**2**; 500 MHz; Acetone- $d_6$ )

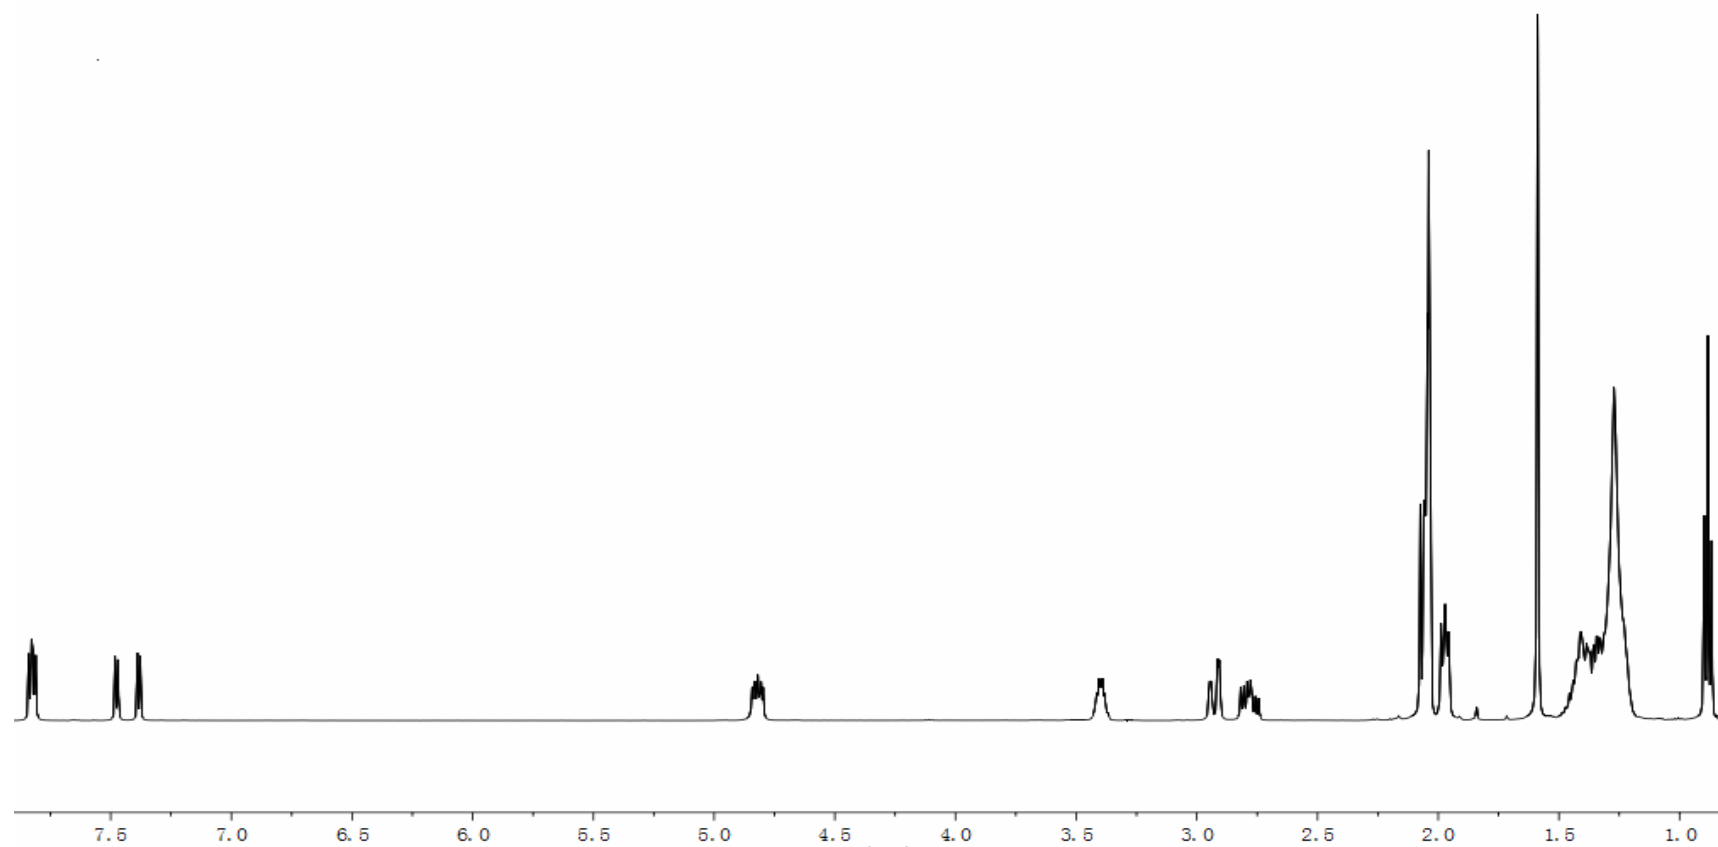

**Figure S4.**  $^{13}\text{C}$  NMR Spectrum of Pestalotic Acid B (**2**; 100 MHz; Acetone- $d_6$ )

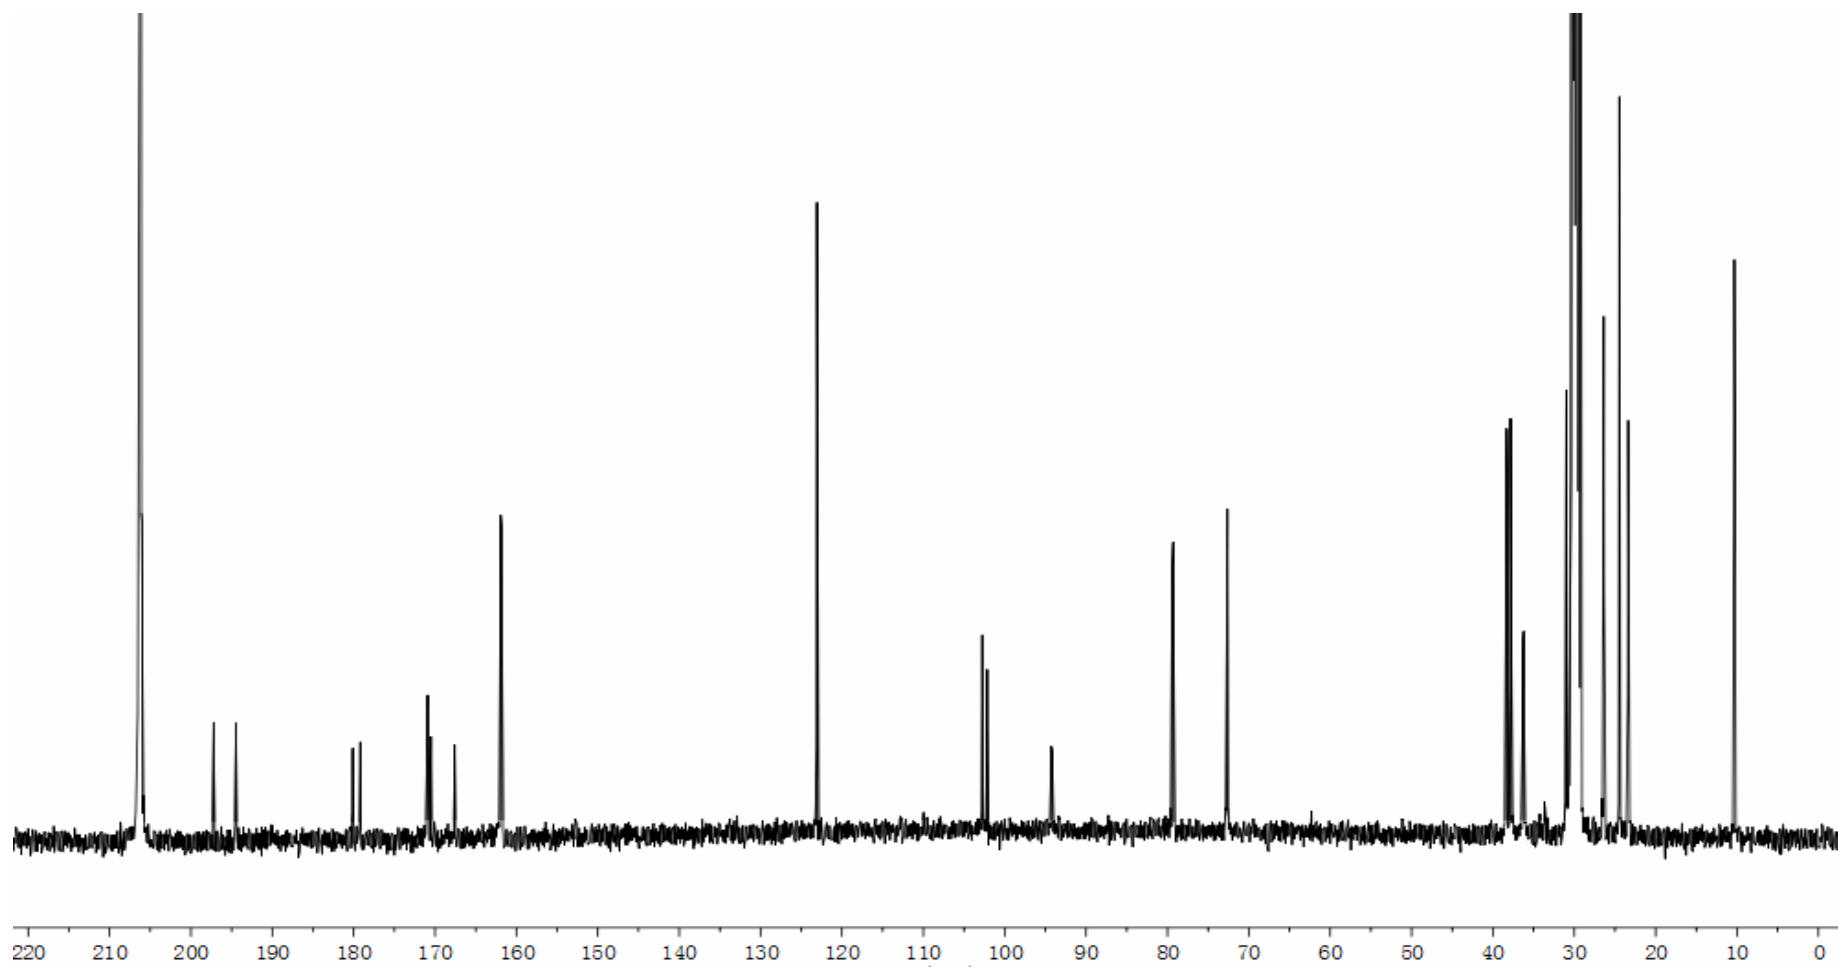

**Figure S5.**  $^1\text{H}$  NMR Spectrum of Pestalotic Acid C (**3**; 500 MHz; Acetone- $d_6$ )

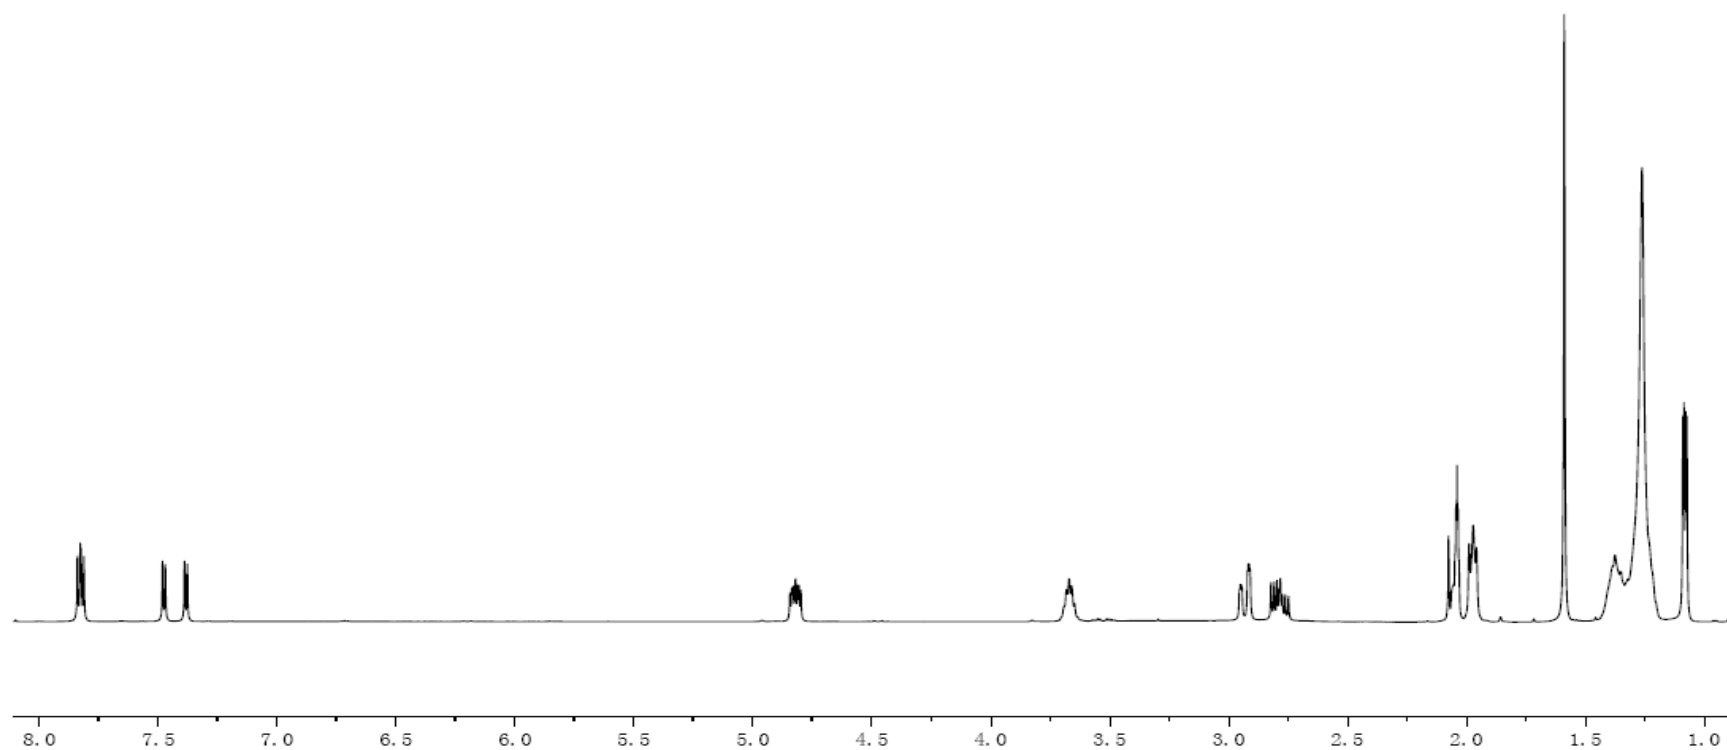

**Figure S6.**  $^{13}\text{C}$  NMR Spectrum of Pestalotic Acid C (**3**; 100 MHz; Acetone- $d_6$ )

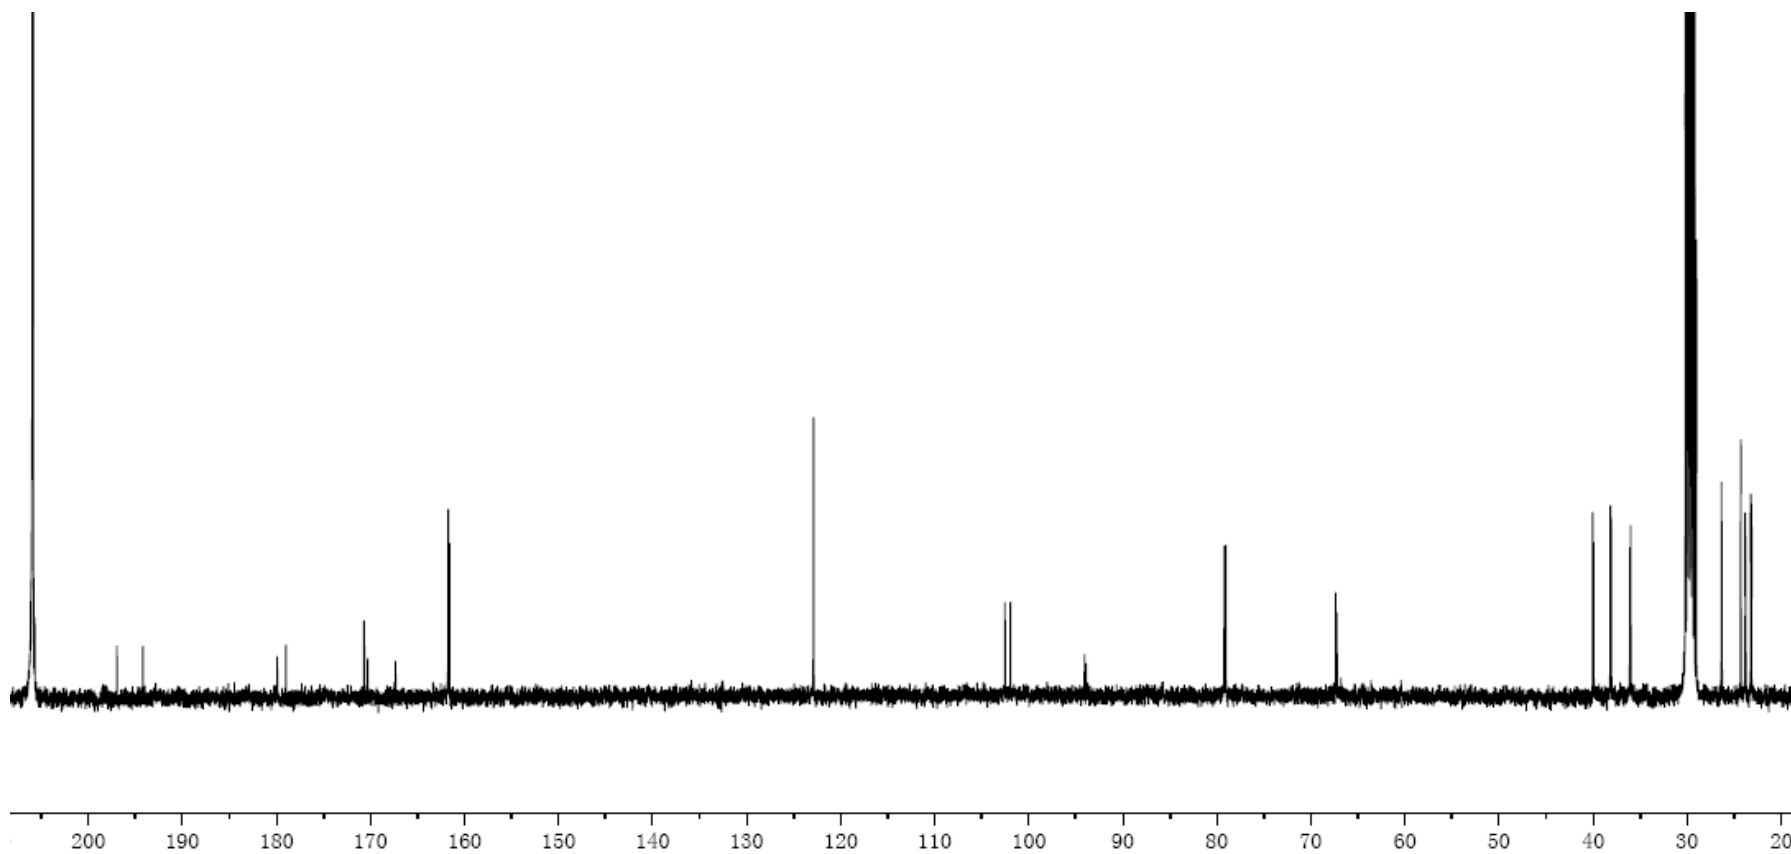



**Figure S7.**  $^1\text{H}$  NMR Spectrum of Pestalotic Acid D (**4**; 400 MHz;  $\text{CDCl}_3$ )

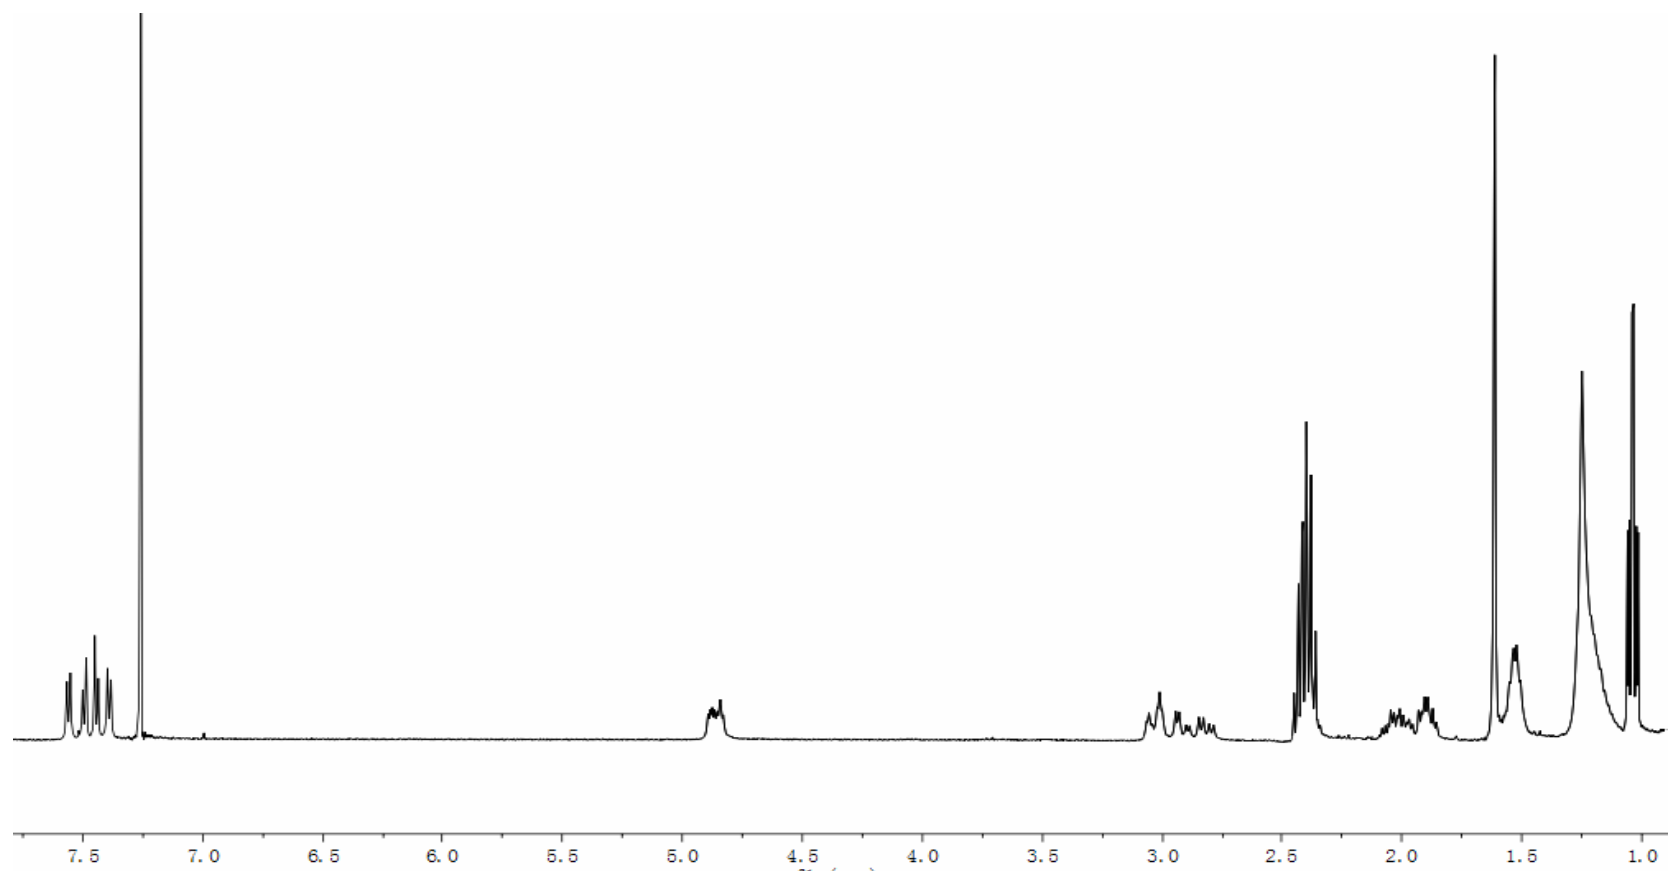

**Figure S8.**  $^{13}\text{C}$  NMR Spectrum of Pestalotic Acid D (**4**; 100 MHz;  $\text{CDCl}_3$ )

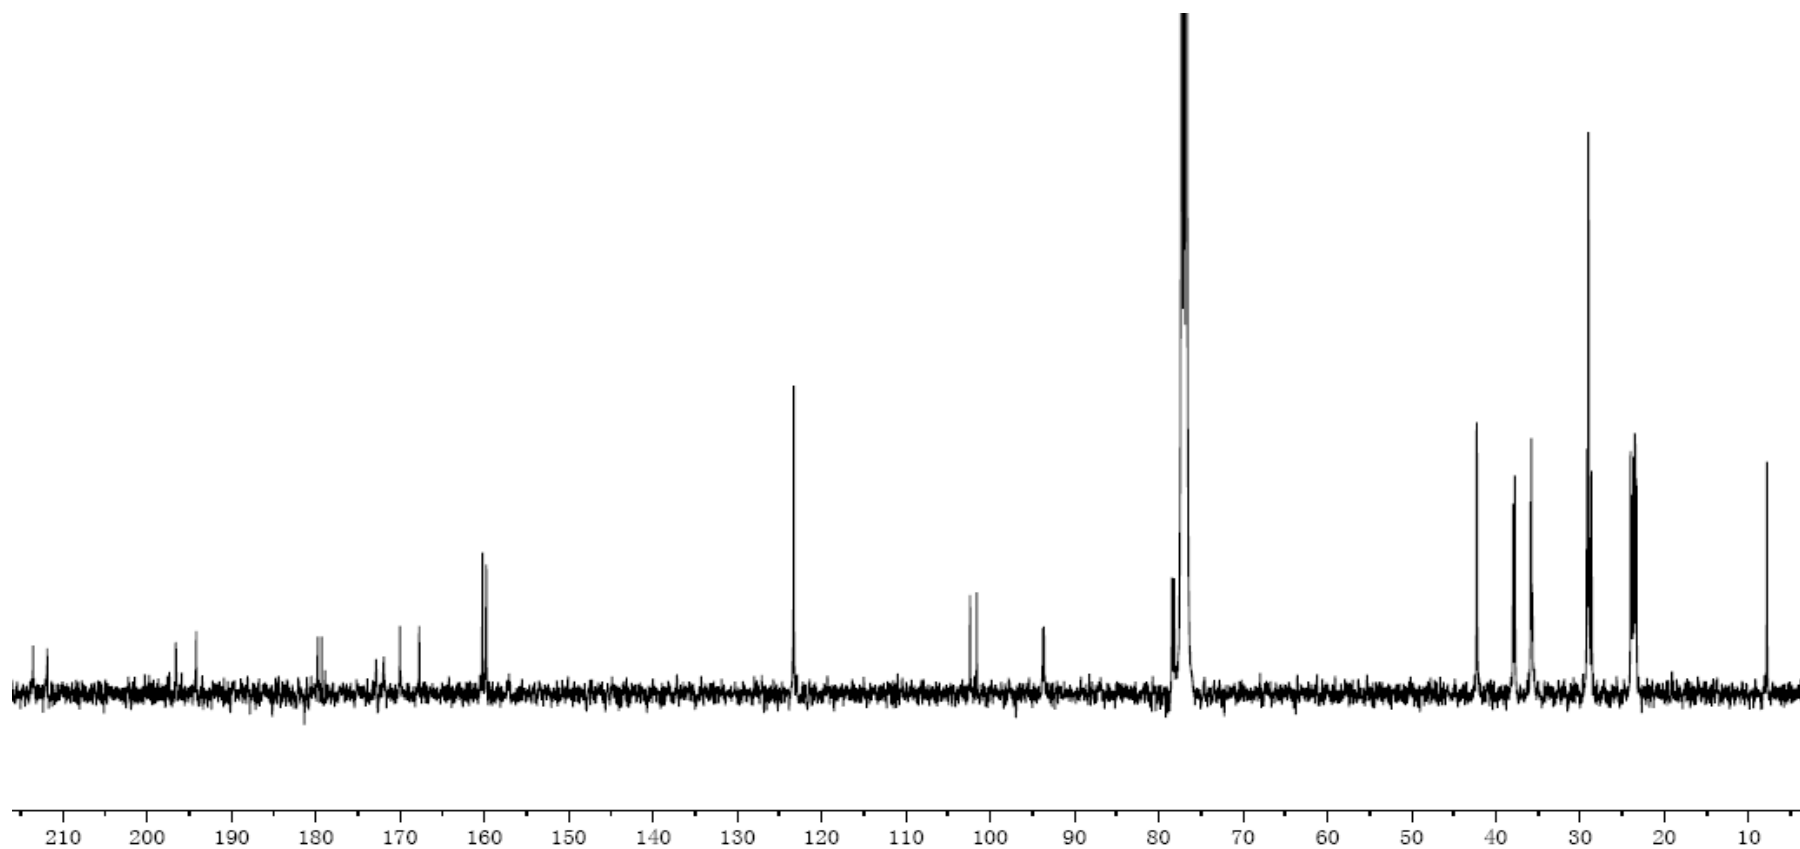

**Figure S9.**  $^1\text{H}$  NMR Spectrum of Pestalotic Acid E (**5**; 400 MHz;  $\text{CDCl}_3$ )

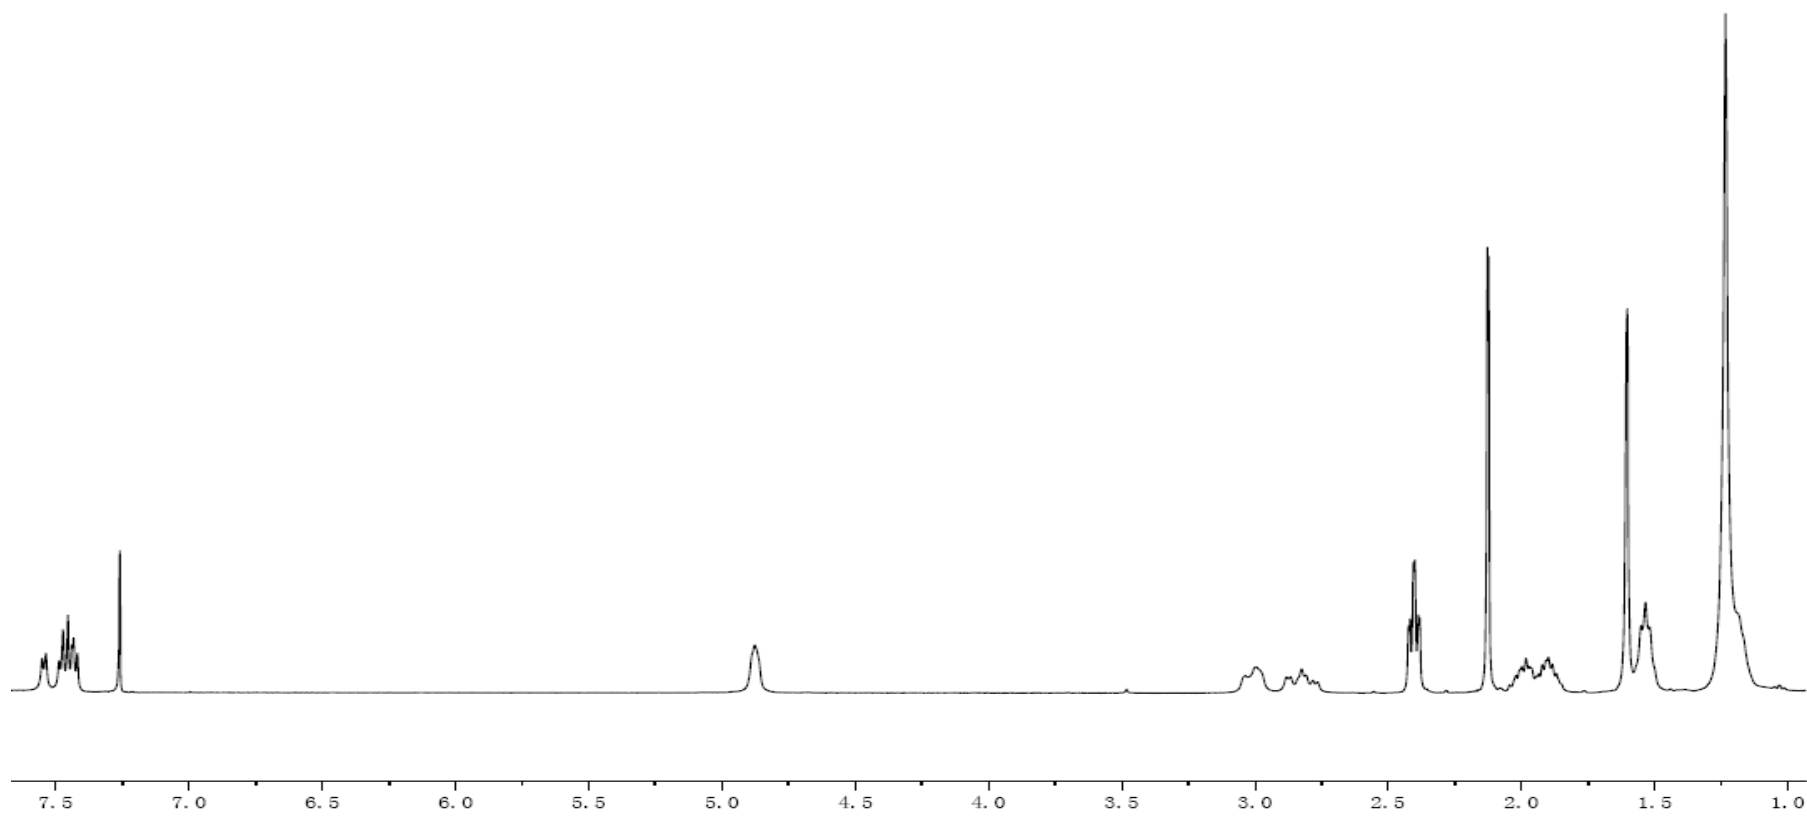

**Figure S10.**  $^{13}\text{C}$  NMR Spectrum of Pestalotic Acid E (**5**; 100 MHz;  $\text{CDCl}_3$ )

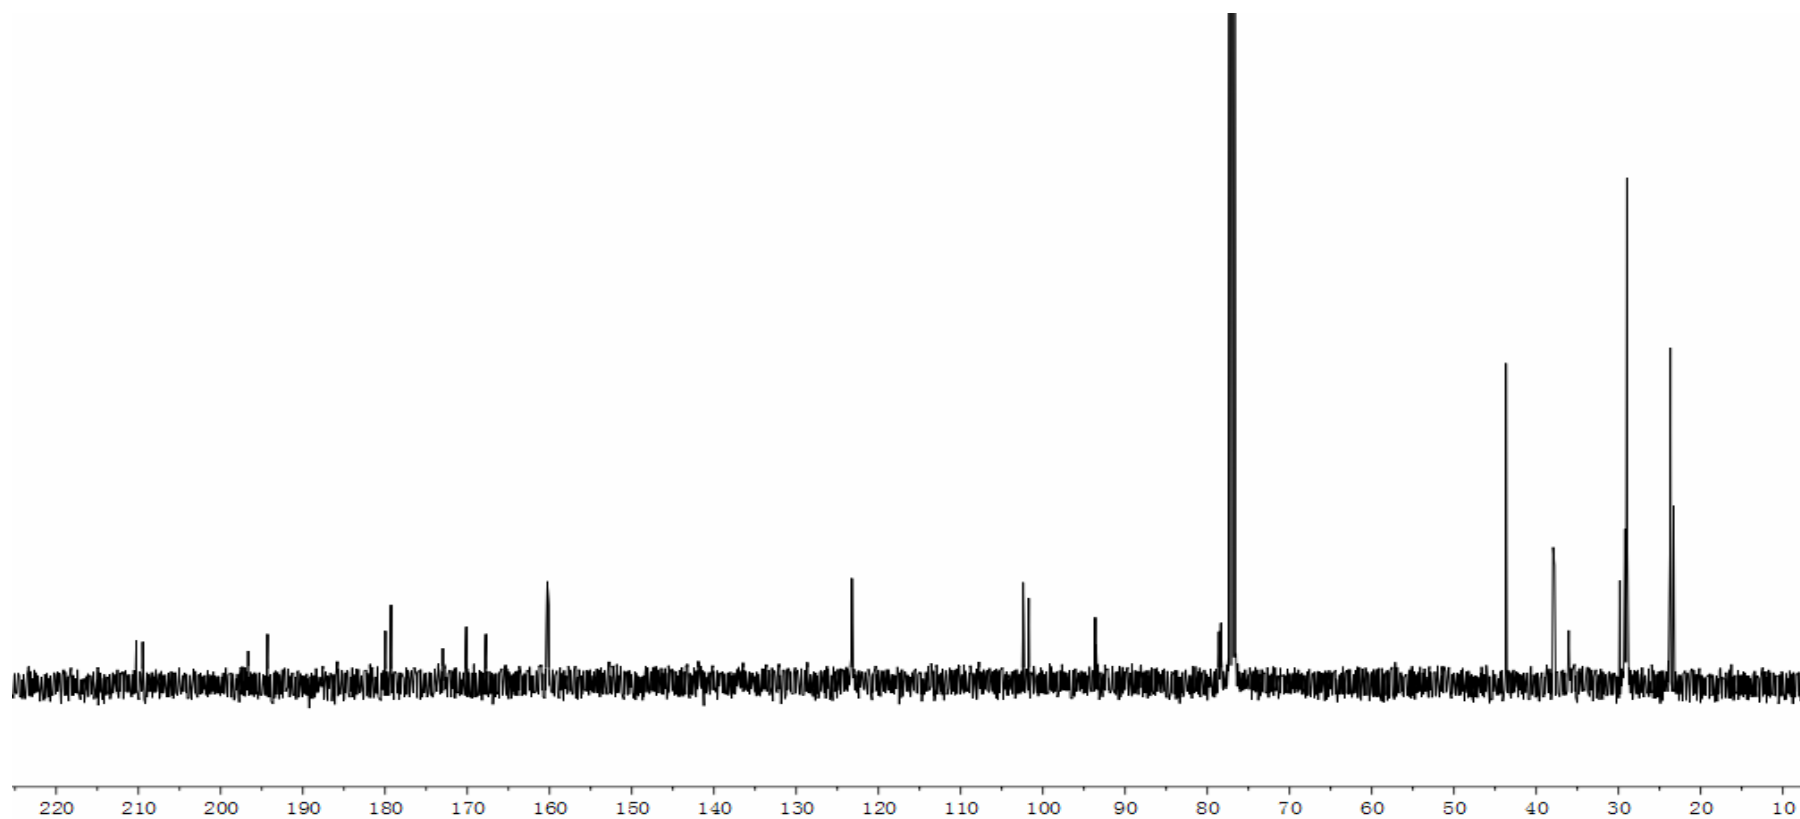

**Figure S11.**  $^1\text{H}$  NMR Spectrum of Pestalotic Acid F (**6**; 400 MHz;  $\text{DMSO-}d_6$ )

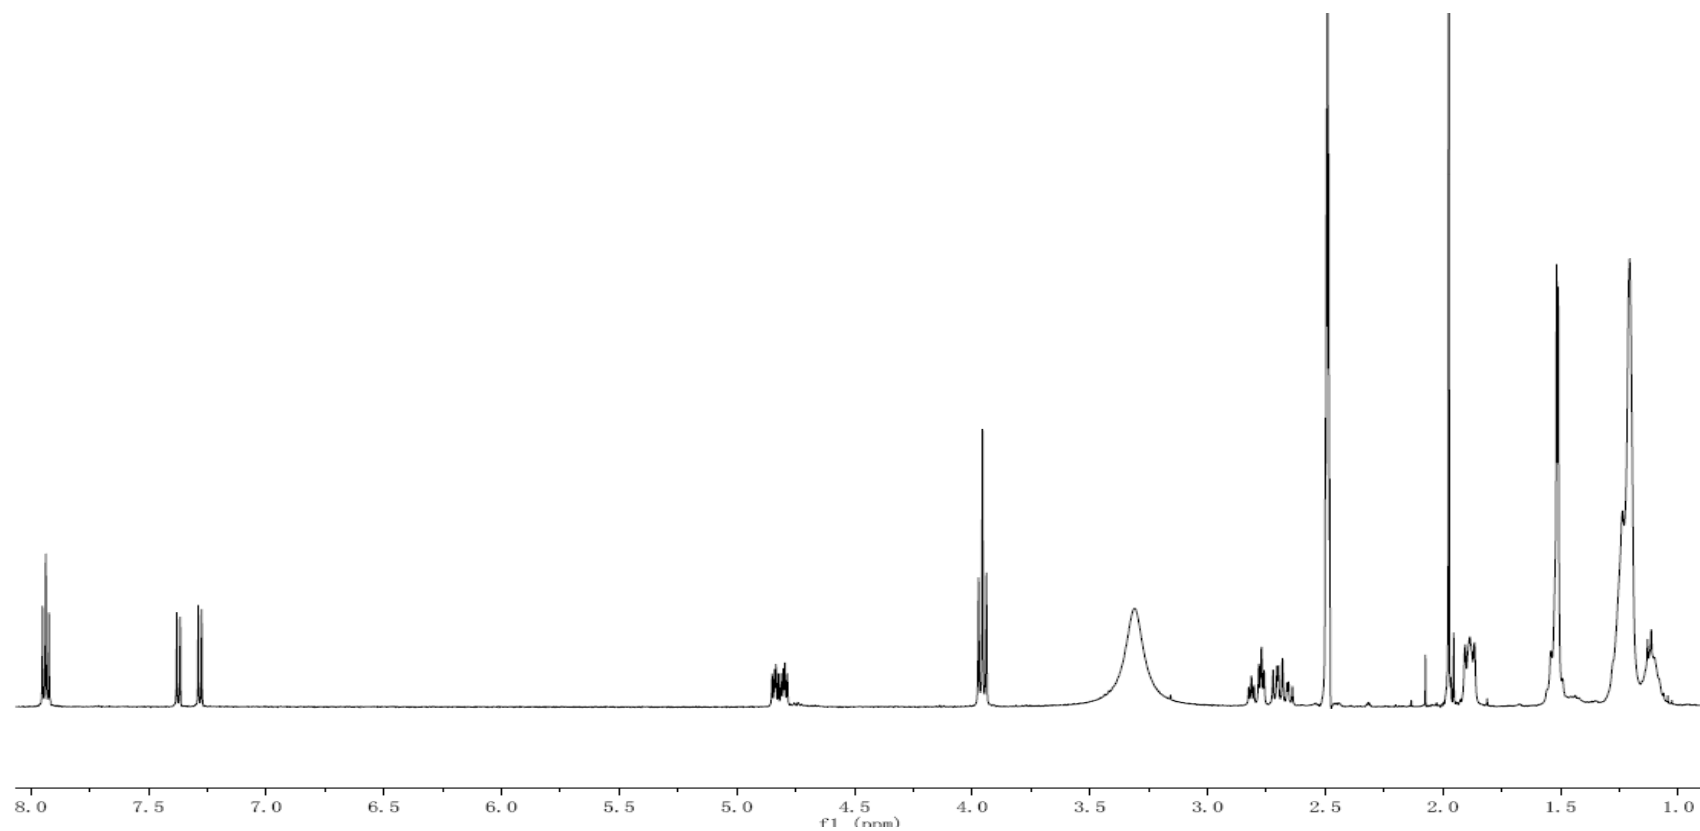

**Figure S12.**  $^{13}\text{C}$  NMR Spectrum of Pestalotic Acid F (**6**; 100 MHz;  $\text{DMSO-}d_6$ )

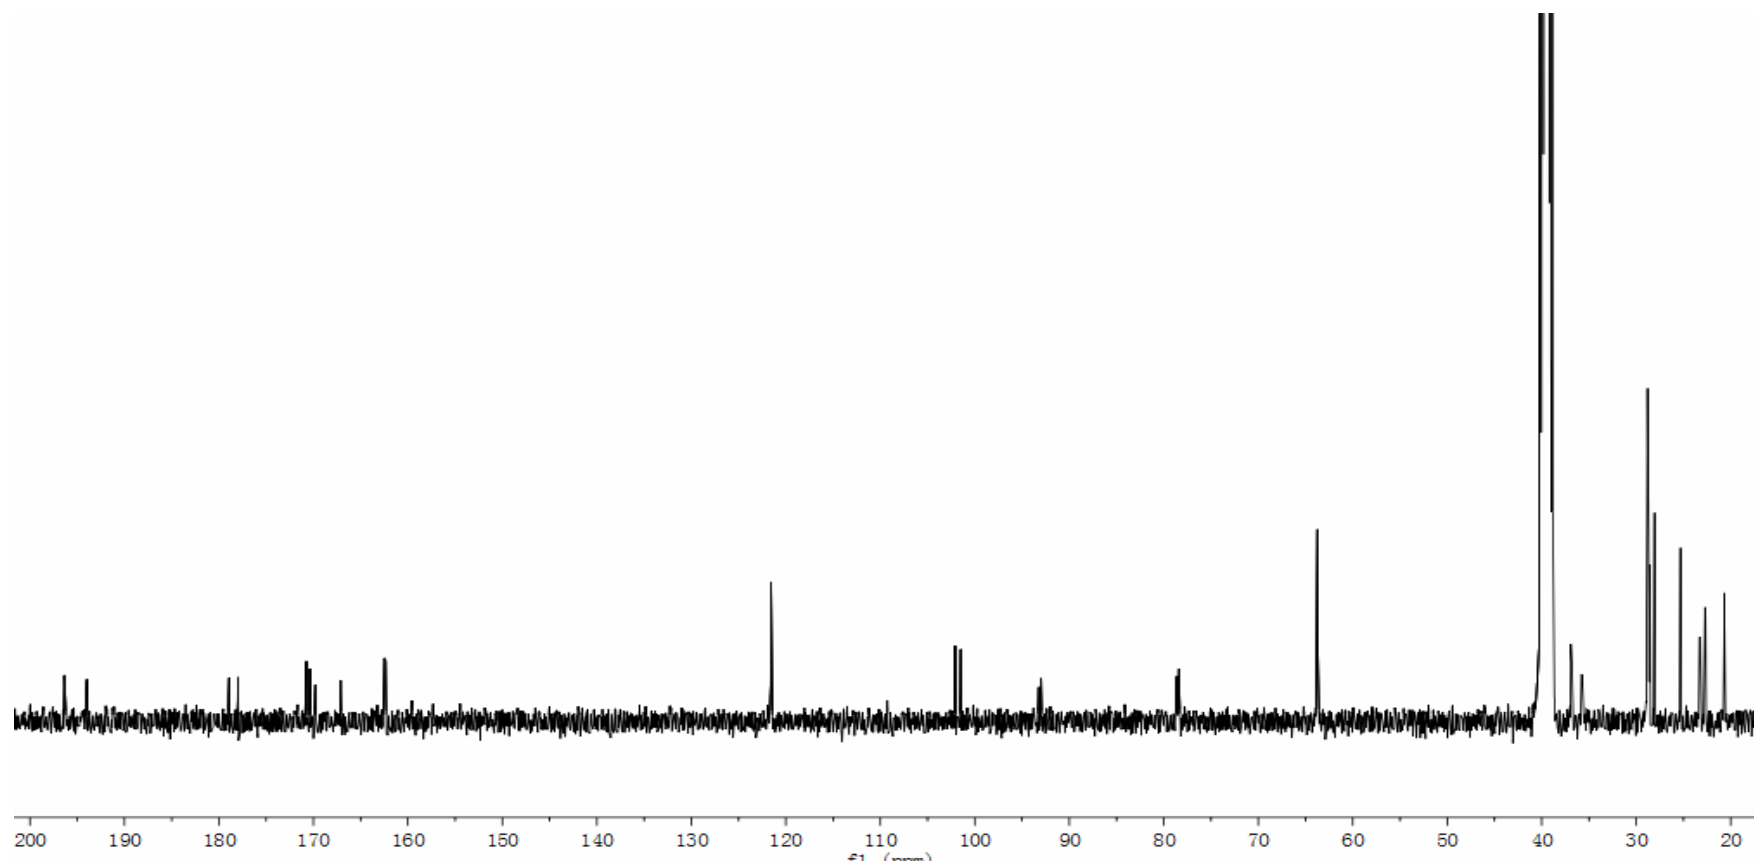

**Figure S13.**  $^1\text{H}$  NMR Spectrum of Pestalotic Acid G (**7**; 500 MHz;  $\text{CDCl}_3$ )

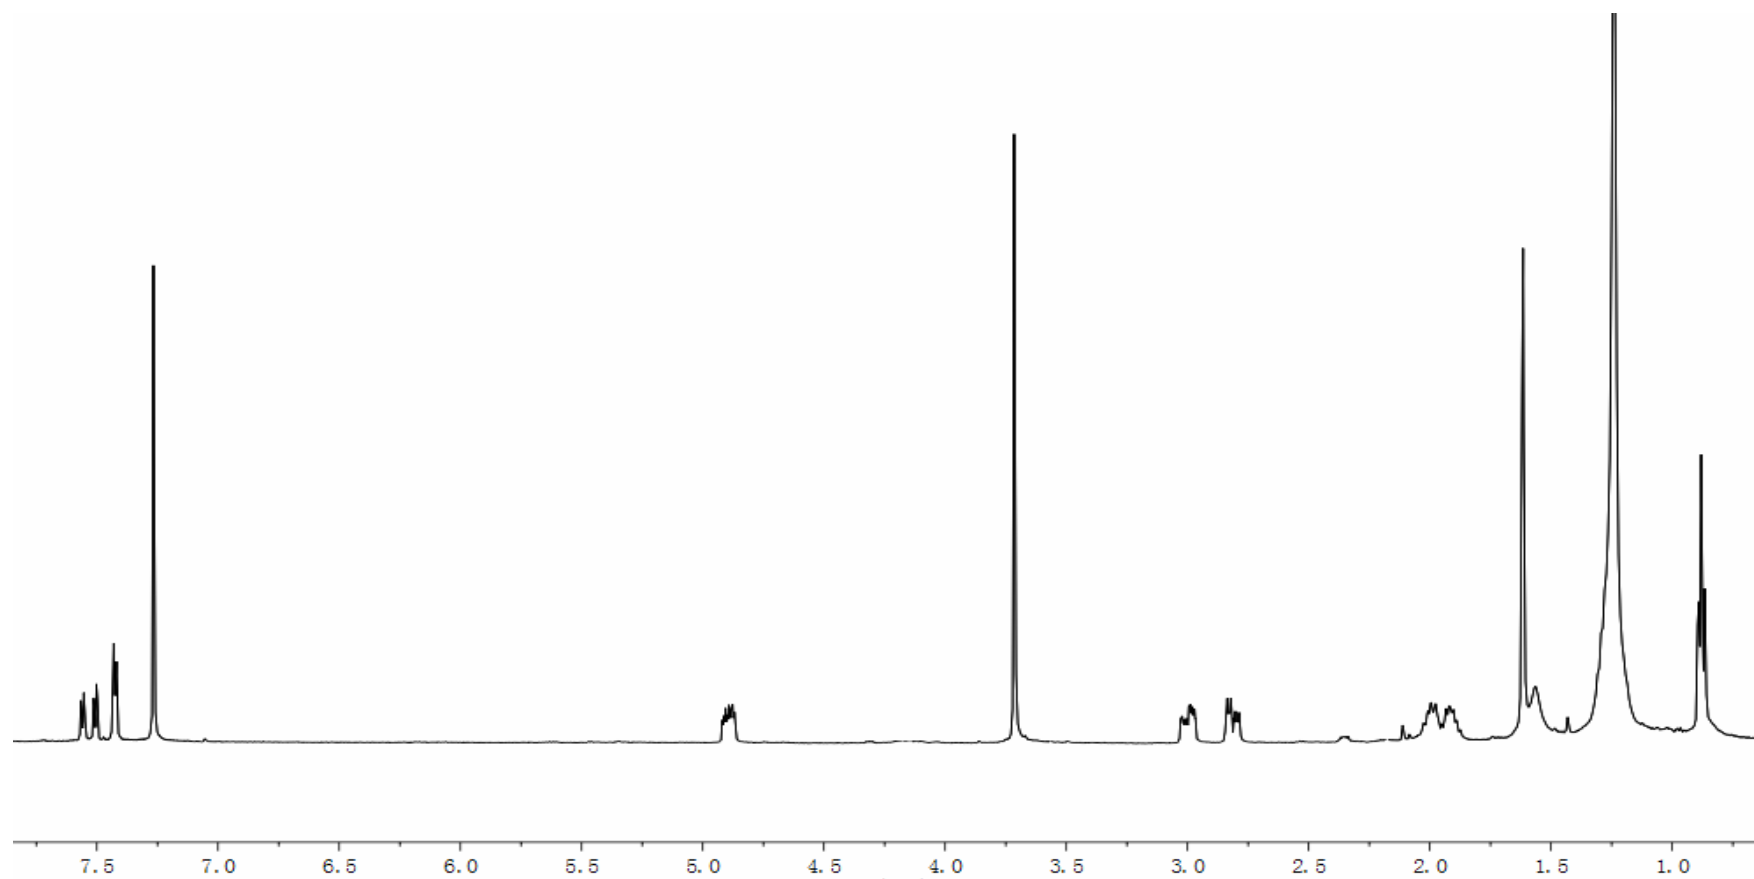

**Figure S14.**  $^{13}\text{C}$  NMR Spectrum of Pestalotic Acid G (**7**; 125 MHz;  $\text{CDCl}_3$ )

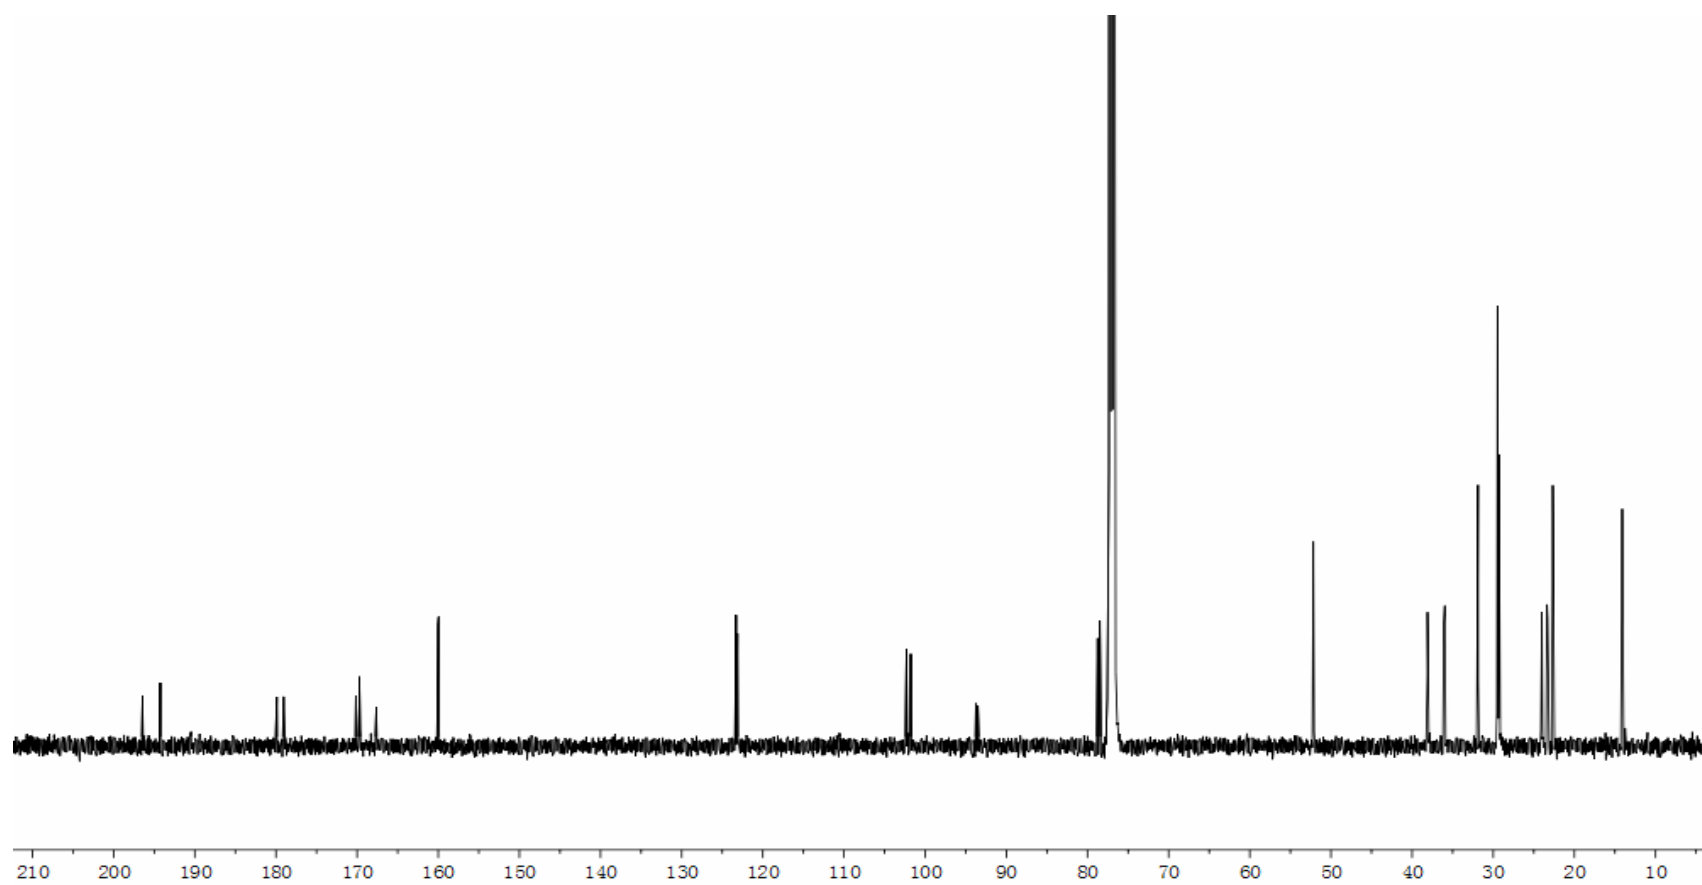



**Figure S15.** CD Spectrum of Pestalotic Acid A (**1**) in MeOH

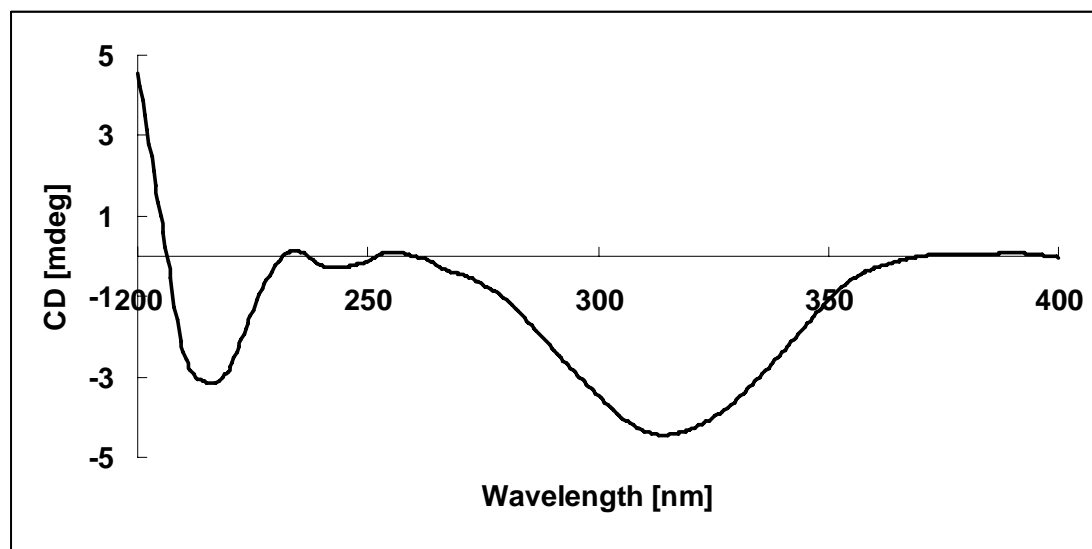

**Figure S16.** CD Spectrum of Pestalotic Acid B (**2**) in MeOH

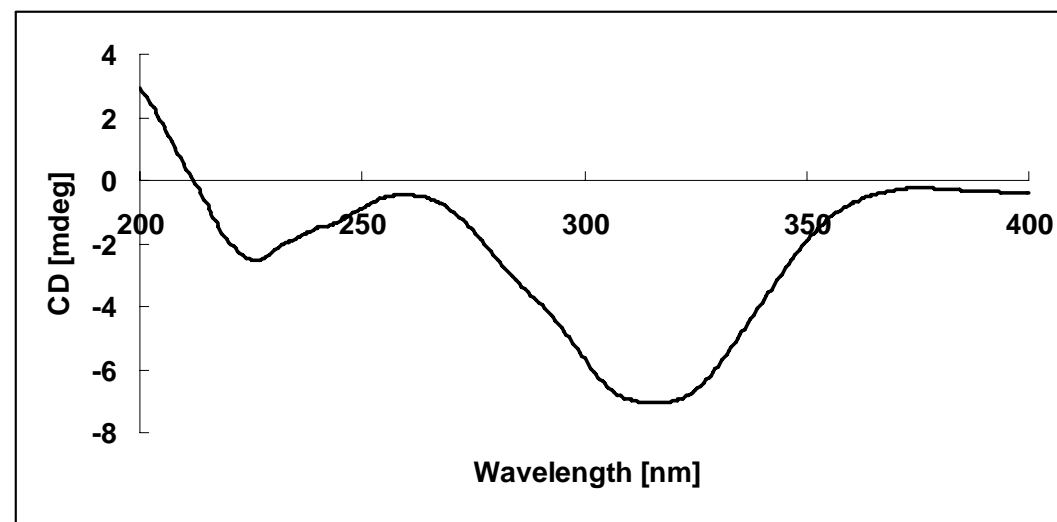

**Figure S17.** CD Spectrum of Pestalotic Acid C (**3**) in MeOH

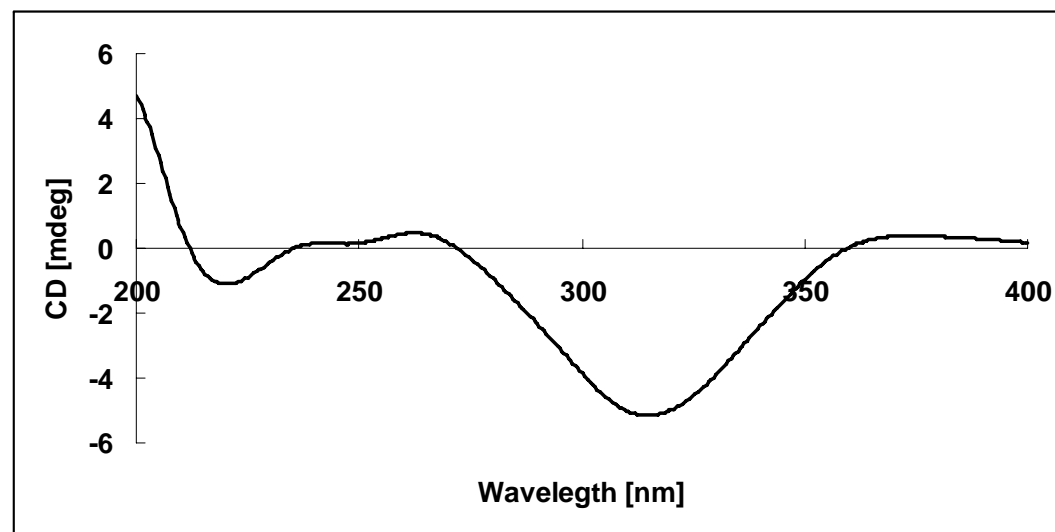

**Figure S18.** CD Spectrum of Pestalotic Acid D (**4**) in MeOH

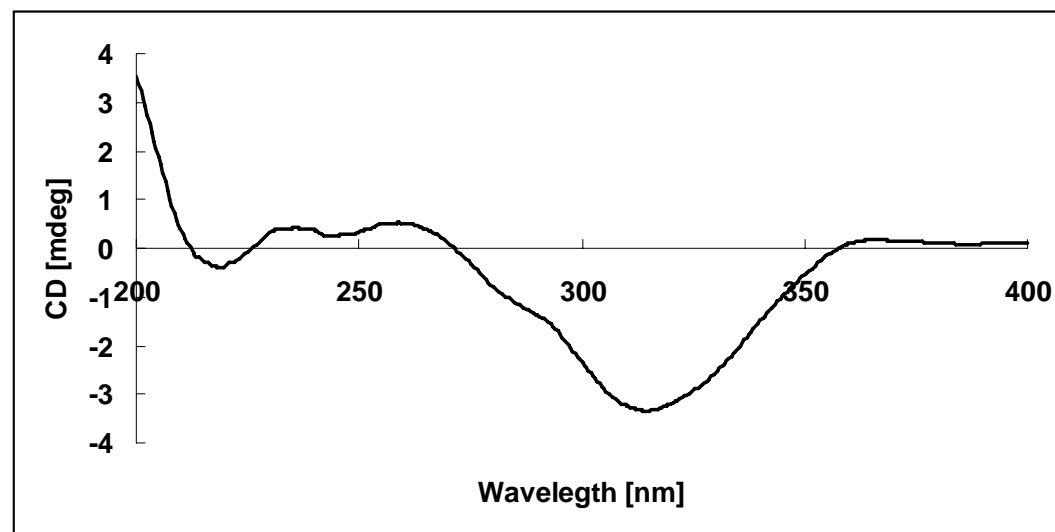

**Figure S19.** CD Spectrum of Pestalotic Acid E (**5**) in MeOH

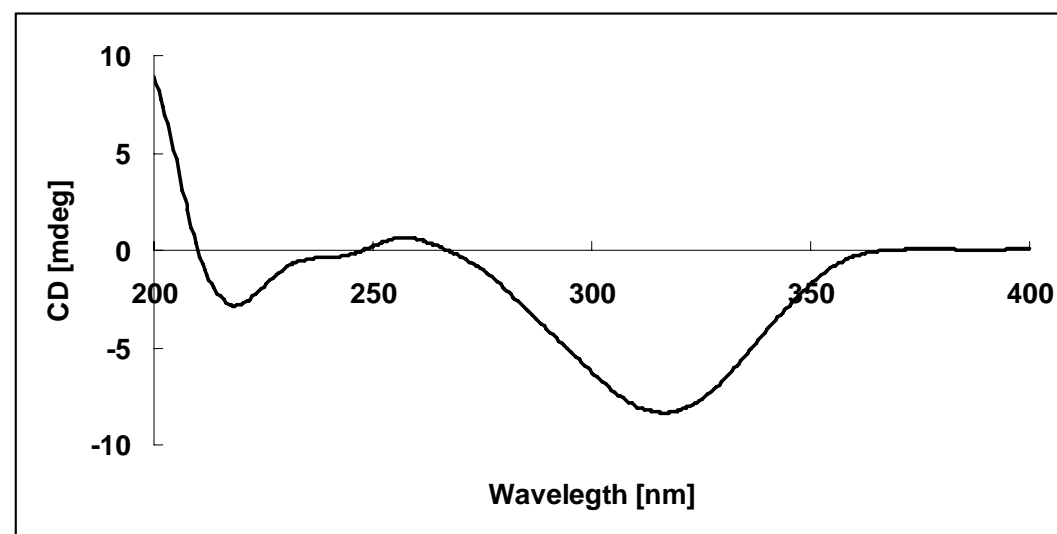

**Figure S20.** CD Spectrum of Pestalotic Acid F (**6**) in MeOH

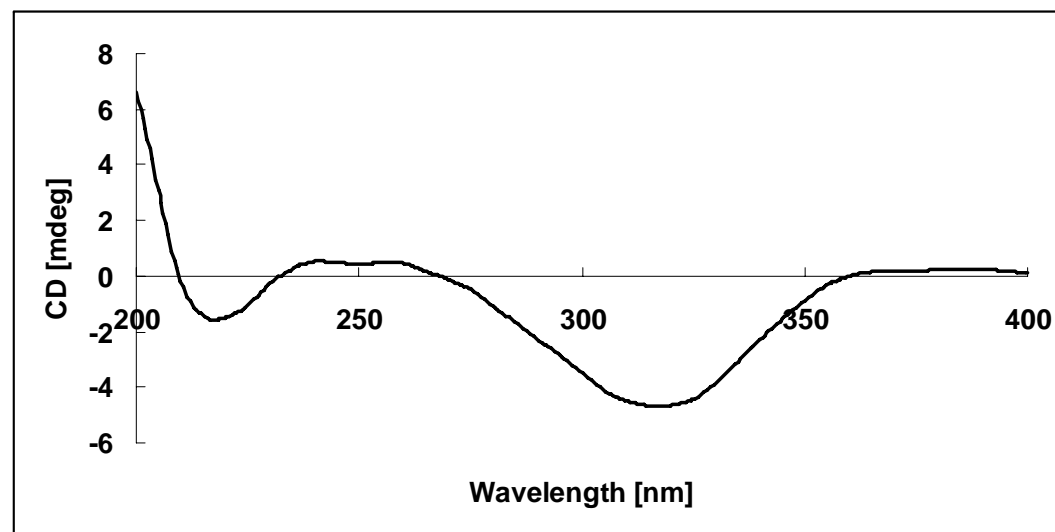

**Figure S21.** CD Spectrum of Pestalotic Acid G (**7**) in MeOH

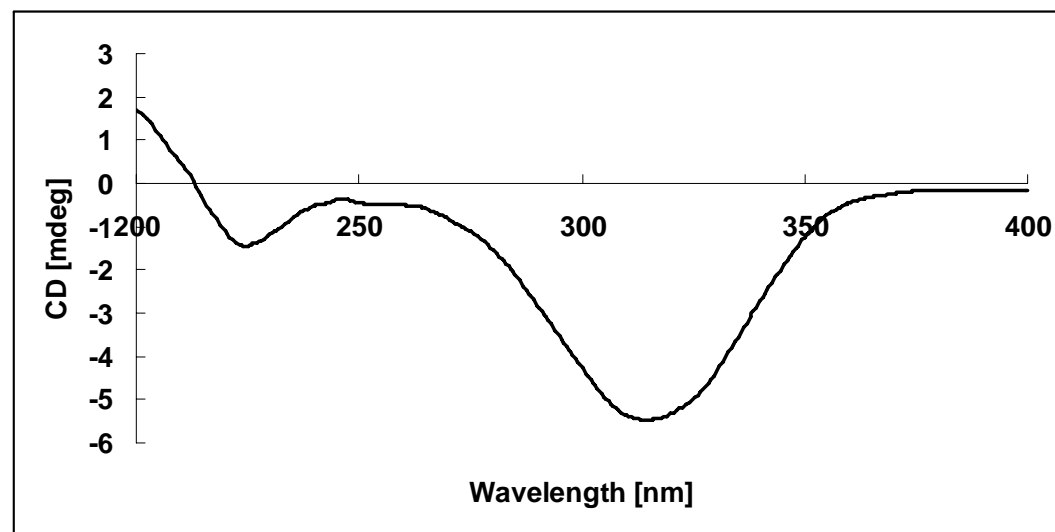

**Figure S22.** The Optimized Conformers for the *E*-isomers of **8a** and **8b**

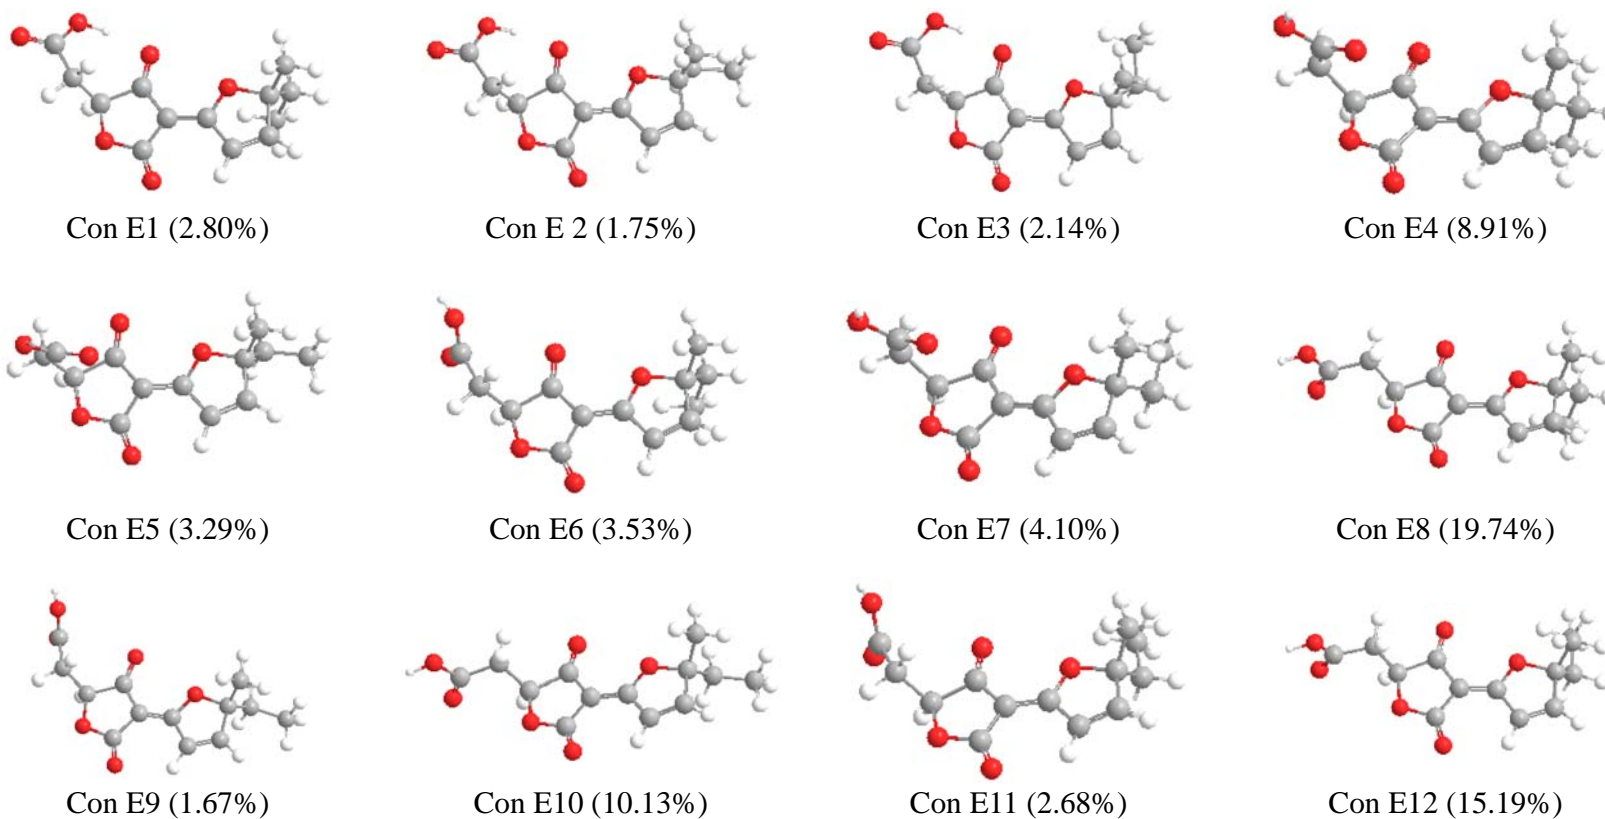



**Figure S23.** The Optimized Conformers for the *Z*-isomers of **8a** and **8b**

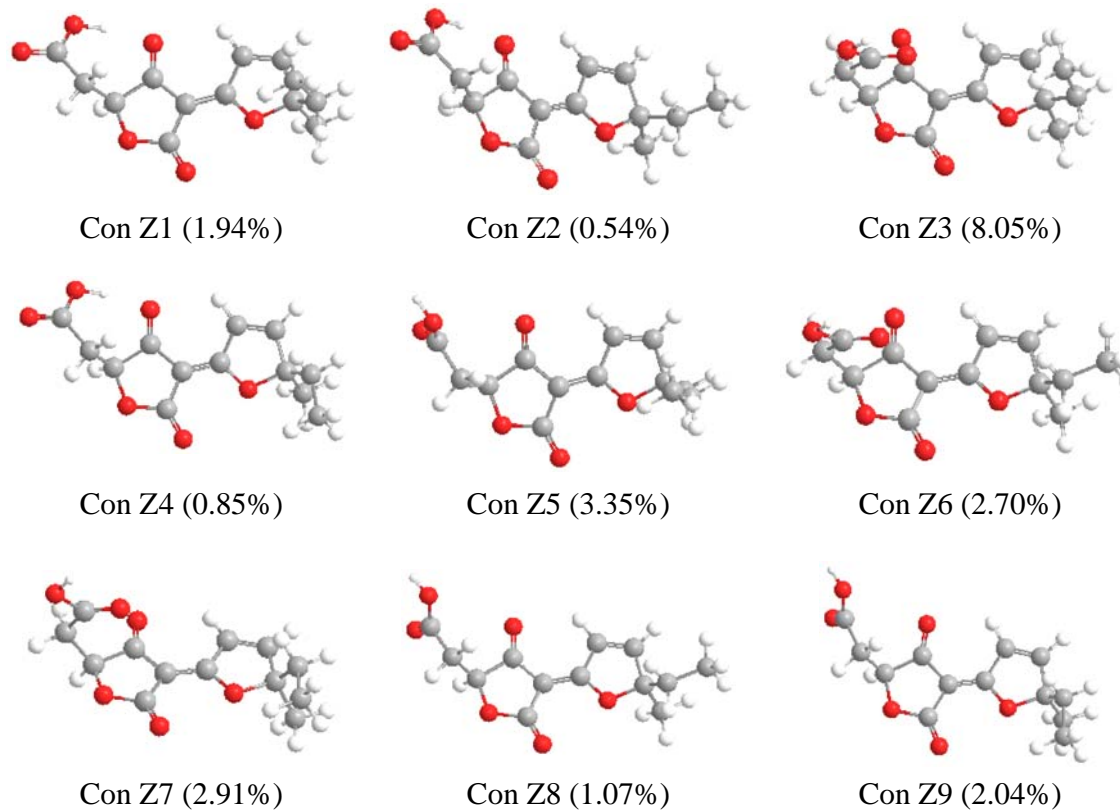

**Figure S24.** The Calculated UV Spectrum of the *E*-isomers of **8a** and **8b** and the Measured UV Spectrum of **1**

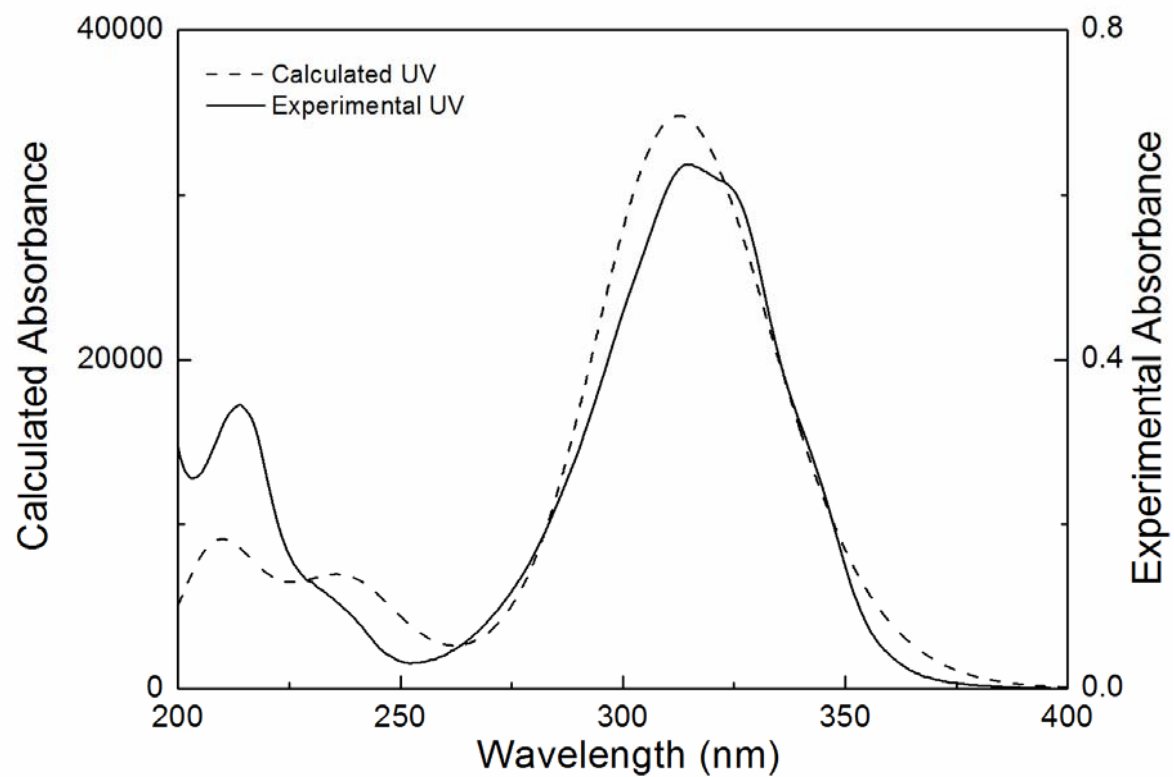

**Figure S25.** The Calculated UV Spectrum of the *Z*-isomers of **8a** and **8b** and the Measured UV Spectrum of **1**

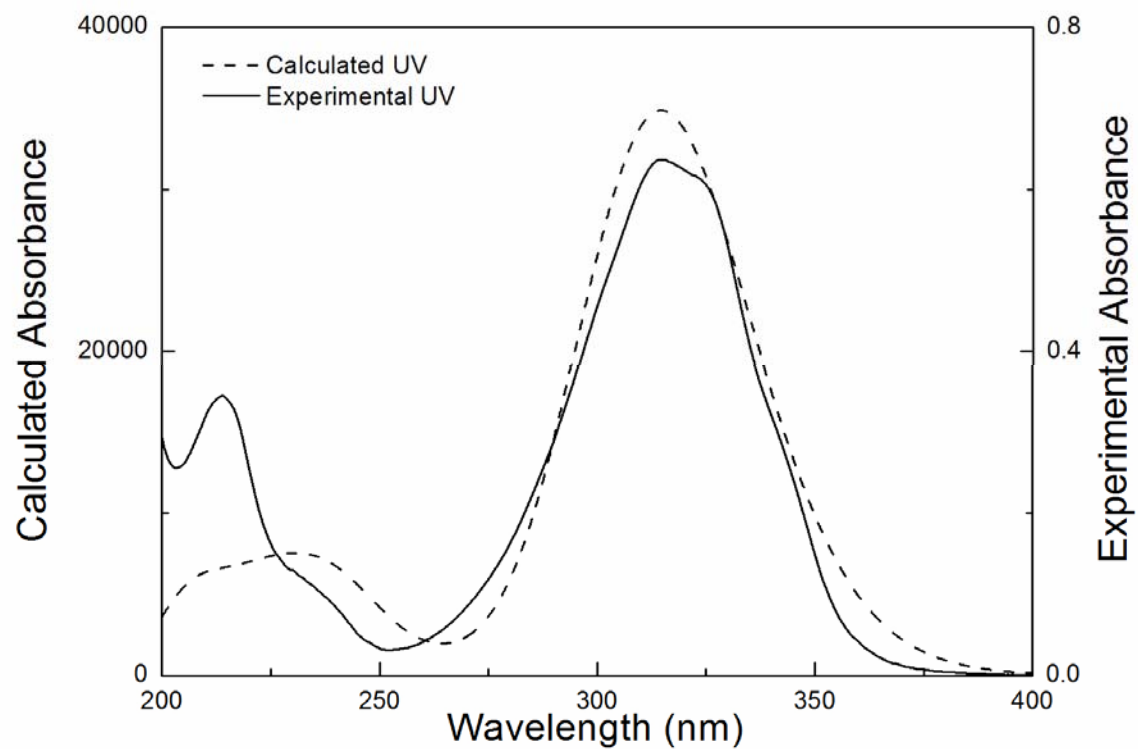

**Figure S26.** The Calculated UV Spectrum of **8a** and **8b** and the Measured UV Spectrum of **1**

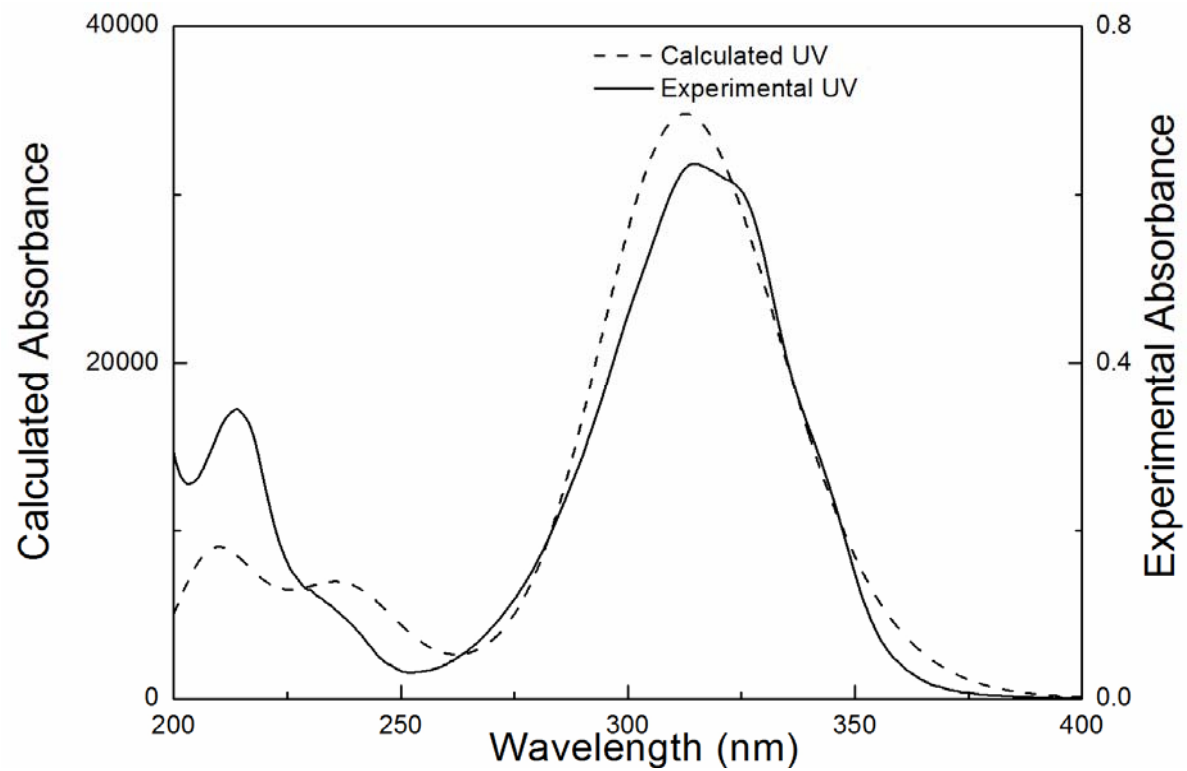

Supplement: c2ob25469g.pdf [file c2ob25469g.pdf]
